# Supplementary material
Source: publisher figshare collection journal article supplement (https://acs.figshare.com/ndownloader/files/3844603)
Supplement: Supplementary file 1 [file 3844603]

**Supplementary material 1:** Typical MS/MS data (Phenyx software output) with MS/MS spectrum and detailed coverage that was observed. Matching results from MS/MS with the corresponding transcript were then manually assessed and checked using Biolynx and the PepSeq module (Waters-Micromass).

1) A-superfamily propeptide: FPSDSASDGRDDEAKDE

Peptide match details:

Theoretical mass: 1839.739

Experimental m/z: 920.874, charges: 2, # peaks: 1899

Match delta m/z: 0.003, score: 12.73, charge: 2

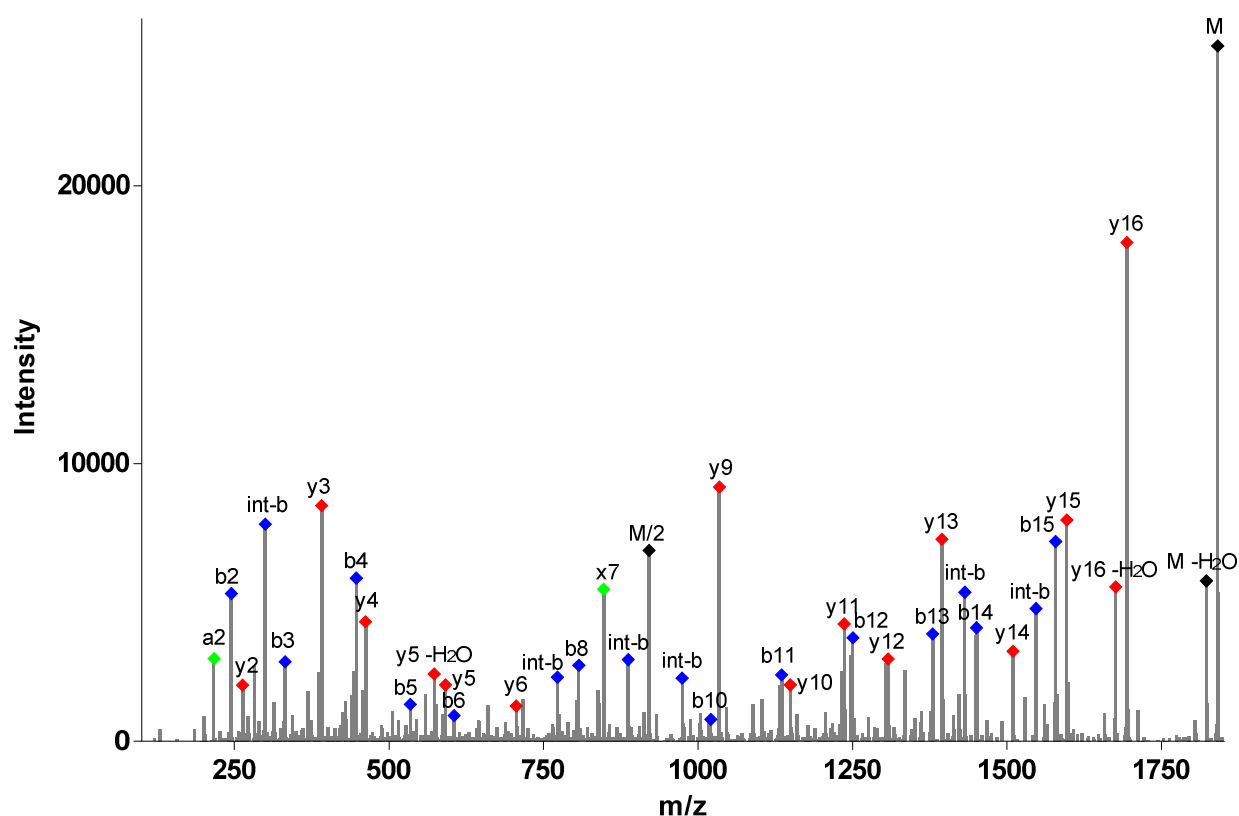

Ion series: ◆ b ions, ◆ y ions, ◆ other ions - Masses: ◆

| Value Types : Delta Mass |        |        | Percentage of most intense peaks: |        |        |        |        |        |        |        |        |        | 70<x<100 |        | 50<x<70 |        | 30<x<50 |  | 10<x<30 |  | <10 |  |
|--------------------------|--------|--------|-----------------------------------|--------|--------|--------|--------|--------|--------|--------|--------|--------|----------|--------|---------|--------|---------|--|---------|--|-----|--|
|                          | 1      | 2      | 3                                 | 4      | 5      | 6      | 7      | 8      | 9      | 10     | 11     | 12     | 13       | 14     | 15      | 16     | 17      |  |         |  |     |  |
| a                        |        | -0.006 |                                   | 0.003  | -0.005 | -0.018 |        |        |        |        |        |        | -0.040   | 0.037  |         |        |         |  |         |  |     |  |
| a-H2O                    |        |        |                                   | -0.008 | -0.006 | 0.011  | 0.043  |        |        | 0.023  | 0.030  |        |          |        |         |        |         |  |         |  |     |  |
| a-NH3                    |        |        |                                   |        |        |        |        |        |        | -0.144 |        |        | 0.003    |        |         |        |         |  |         |  |     |  |
| b                        |        | -0.002 | -0.010                            | -0.013 | -0.021 | -0.013 |        | 0.006  |        | -0.032 | 0.015  | 0.022  | 0.015    | -0.098 | 0.067   | 0.054  | 0.036   |  |         |  |     |  |
| b-H2O                    |        |        | -0.000                            | -0.003 | -0.001 | -0.014 | -0.022 | 0.035  | 0.016  | -0.032 | -0.036 | 0.031  | -0.086   | 0.091  | 0.056   | 0.063  | 0.016   |  |         |  |     |  |
| b-NH3                    |        |        |                                   |        |        |        |        |        |        |        | 0.078  | -0.155 | 0.017    |        |         |        |         |  |         |  |     |  |
| sequence                 | F      | P      | S                                 | D      | S      | A      | S      | D      | G      | R      | D      | D      | E        | A      | K       | D      | E       |  |         |  |     |  |
| y                        | -0.073 | 0.038  | 0.016                             | 0.014  | 0.007  | 0.005  | -0.073 | 0.005  | -0.032 | -0.033 | -0.004 | -0.001 | -0.008   | -0.011 | -0.008  | -0.013 |         |  |         |  |     |  |
| y-H2O                    | 0.036  | 0.048  | 0.015                             | 0.033  | 0.036  | 0.014  | 0.037  |        |        |        |        |        |          |        |         |        |         |  |         |  |     |  |
| y-NH3                    | -0.240 |        | -0.222                            | -0.164 | -0.161 |        |        | -0.052 | -0.129 |        |        |        |          |        |         |        |         |  |         |  |     |  |
|                          | 17     | 16     | 15                                | 14     | 13     | 12     | 11     | 10     | 9      | 8      | 7      | 6      | 5        | 4      | 3       | 2      | 1       |  |         |  |     |  |

| immonium ion | delta mass |
|--------------|------------|
| R            | -0.020     |

| precursor | delta mass |
|-----------|------------|
| 1+        | -0.073     |
| 2+        | 0.067      |

## 2) A-superfamily propeptide: FPSDSASDGRDD

Peptide match details:

Theoretical mass: 1267.495

Experimental m/z: 634.754, charges: 2, # peaks: 1300

Match delta m/z: 0.001, score: 10.12, charge: 2

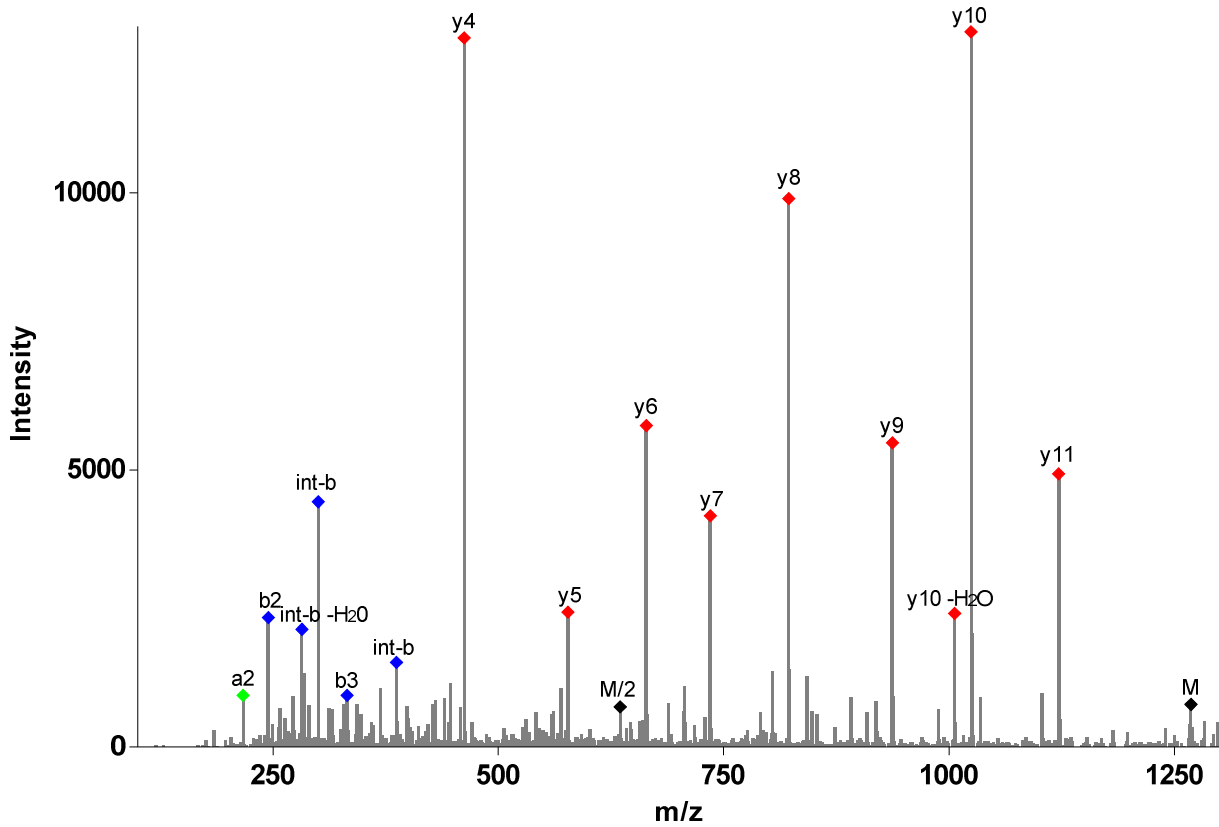

Ion series: ◆ b ions, ◆ y ions, ◆ other ions - Masses: ◆

Value Types : Delta Mass      Percentage of most intense peaks: 70<x<100   50<x<70   30<x<50   10<x<30   <10

|          | 1     | 2      | 3      | 4      | 5      | 6      | 7     | 8      | 9      | 10     | 11     | 12    |
|----------|-------|--------|--------|--------|--------|--------|-------|--------|--------|--------|--------|-------|
| a        |       | -0.006 |        | 0.033  | 0.005  | 0.032  | 0.044 |        |        |        |        |       |
| a-H2O    |       |        |        | 0.112  | 0.024  | 0.001  | 0.043 |        |        |        |        |       |
| a-NH3    |       |        |        |        |        |        |       |        |        |        |        |       |
| b        |       | -0.002 | 0.000  | -0.003 | 0.009  | -0.023 |       | 0.006  |        |        | -0.055 | 0.022 |
| b-H2O    |       |        | -0.000 | 0.007  | -0.021 | 0.016  |       |        |        |        |        |       |
| b-NH3    |       |        |        |        |        |        |       |        |        |        |        |       |
| sequence | F     | P      | S      | D      | S      | A      | S     | D      | G      | R      | D      | D     |
| y        | 0.043 | -0.006 | 0.011  | 0.019  | 0.012  | -0.010 | 0.003 | -0.009 | -0.006 | 0.013  | -0.008 |       |
| y-H2O    | 0.022 | 0.034  | 0.011  | -0.011 | 0.012  | 0.010  | 0.003 |        |        |        |        |       |
| y-NH3    |       | -0.143 | -0.146 | 0.062  | -0.115 | -0.097 | 0.006 | -0.016 | -0.033 | -0.014 |        |       |
|          | 12    | 11     | 10     | 9      | 8      | 7      | 6     | 5      | 4      | 3      | 2      | 1     |

| precursor | delta mass |
|-----------|------------|
| 1+        | 0.043      |

3) A-superfamily peptide: QKDLVVTATTTCCGYNPMTICPPCMCTYSCPPKKKKP

Peptide match details:

Theoretical mass: 4470.946

Experimental m/z: 895.182, charges: 5, # peaks: 4372

Match delta m/z: 0.015, score: 10.2, charge: 5

PTMs: Q1: Pyroglutamate; M18, M25: Oxidation; P22, P23, P31, P32: Hydroxyproline All C: Carboxamidomethyl-Cysteine

NB: The theoretical mass corresponds to the final peptide mass minus the mass of the combination of glycans

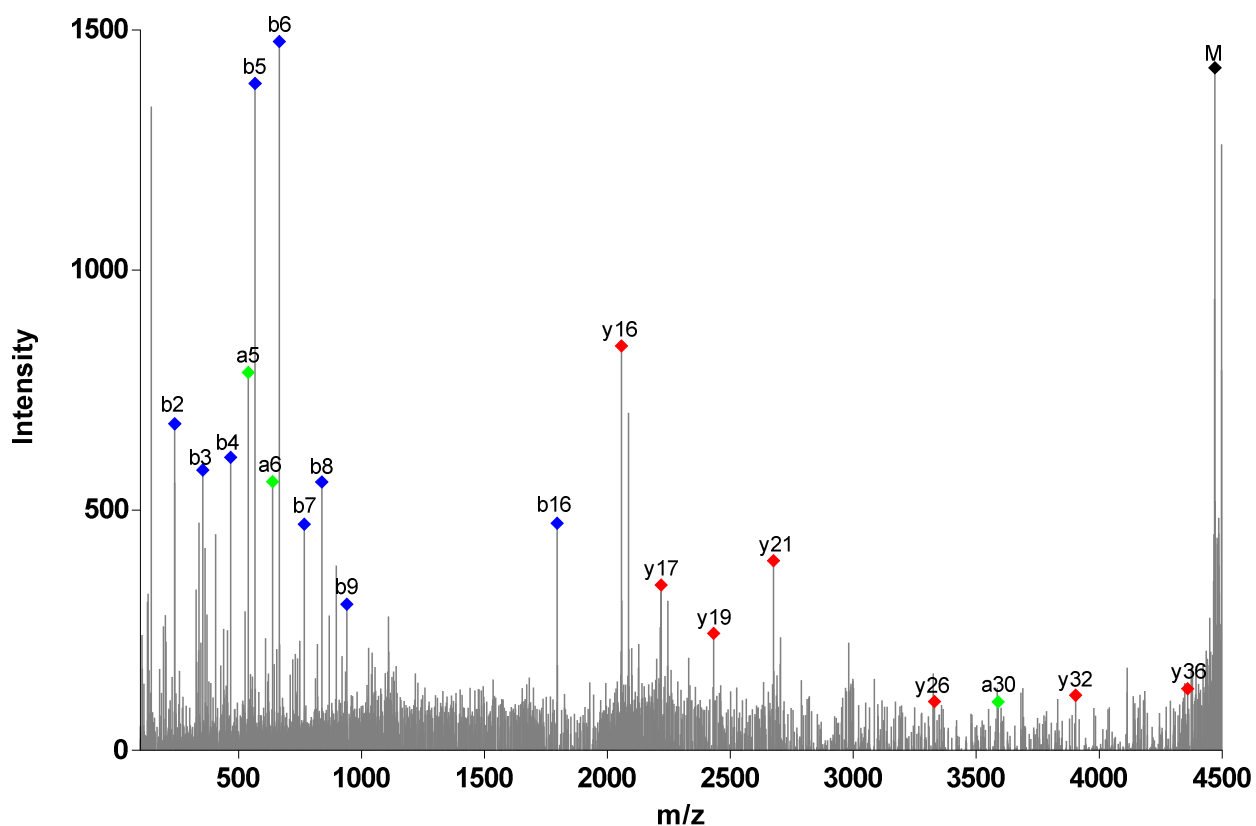

Ion series: ◆ b ions, ◆ y ions, ◆ other ions - Masses: ◆

Value Types : Delta Mass

Percentage of most intense peaks:

70<x<100 50<x<70 30<x<50 10<x<30 <10

|          | 1      | 2      | 3      | 4      | 5      | 6      | 7      | 8      | 9      | 10     | 11     | 12 | 13 | 14     | 15    | 16     | 17 | 18    | 19     | 20    | 21     | 22     | 23 | 24 | 25 | 26 | 27 | 28    | 29 | 30 | 31 | 32 | 33 | 34 | 35 | 36 | 37    |
|----------|--------|--------|--------|--------|--------|--------|--------|--------|--------|--------|--------|----|----|--------|-------|--------|----|-------|--------|-------|--------|--------|----|----|----|----|----|-------|----|----|----|----|----|----|----|----|-------|
| a        |        |        |        | -0.013 | -0.016 | -0.008 | -0.020 |        |        |        |        |    |    | 0.090  |       |        |    |       |        |       |        |        |    |    |    |    |    |       |    |    |    |    |    |    |    |    |       |
| a-H2O    |        |        |        |        |        |        | 0.008  |        |        |        |        |    |    |        |       |        |    | 0.021 |        |       |        |        |    |    |    |    |    |       |    |    |    |    |    |    |    |    |       |
| a-NH3    |        | 0.072  |        |        |        | -0.014 |        |        |        |        | 0.033  |    |    |        |       |        |    |       |        | 0.002 |        |        |    |    |    |    |    |       |    |    |    |    |    |    |    |    |       |
| b        |        | -0.007 | -0.005 | -0.017 | -0.018 | -0.022 | -0.011 | -0.014 | -0.017 | -0.001 | -0.052 |    |    | -0.046 | 0.001 |        |    | 0.001 | -0.060 |       |        |        |    |    |    |    |    | 0.142 |    |    |    |    |    |    |    |    | 0.056 |
| b-H2O    |        |        |        |        |        |        | -0.033 | -0.014 | -0.018 | -0.033 | 0.000  |    |    |        |       |        |    |       |        |       |        |        |    |    |    |    |    |       |    |    |    |    |    |    |    |    | 0.131 |
| b-NH3    |        |        |        |        |        |        |        |        |        |        |        |    |    |        |       |        |    |       |        |       |        |        |    |    |    |    |    |       |    |    |    |    |    |    |    |    |       |
| sequence | Q      | K      | D      | L      | V      | V      | T      | A      | T      | T      | T      | C  | C  | G      | Y     | N      | P  | M     | T      | I     | C      | P      | P  | C  | M  | C  | T  | Y     | S  | C  | P  | K  | K  | K  | K  | P  |       |
| y        | -0.291 | 0.065  |        |        |        |        |        |        |        |        |        |    |    |        |       | -0.164 |    |       |        |       | -0.040 | -0.111 |    |    |    |    |    |       |    |    |    |    |    |    |    |    |       |
| y-H2O    | 0.056  |        |        |        |        |        |        |        |        |        |        |    |    |        |       |        |    |       |        |       | -0.050 |        |    |    |    |    |    |       |    |    |    |    |    |    |    |    |       |
| y-NH3    |        |        |        |        |        |        |        |        |        |        |        |    |    |        |       |        |    |       |        |       |        |        |    |    |    |    |    |       |    |    |    |    |    |    |    |    |       |
|          | 37     | 36     | 35     | 34     | 33     | 32     | 31     | 30     | 29     | 28     | 27     | 26 | 25 | 24     | 23    | 22     | 21 | 20    | 19     | 18    | 17     | 16     | 15 | 14 | 13 | 12 | 11 | 10    | 9  | 8  | 7  | 6  | 5  | 4  | 3  | 2  | 1     |

| immonium ion | delta mass |
|--------------|------------|
| Y            | -0.026     |

| precursor | delta mass |
|-----------|------------|
| 1+        | -0.291     |

4) T-superfamily peptide: FFSSIAKLVSQVAPALAGAIIPFIADLVNGVEVVE

Peptide match details:  
Theoretical mass: 3584.027  
Experimental m/z: 1195.676, charges: 3, # peaks: 1112  
Match delta m/z: 0.007, score: 13.61, charge: 3

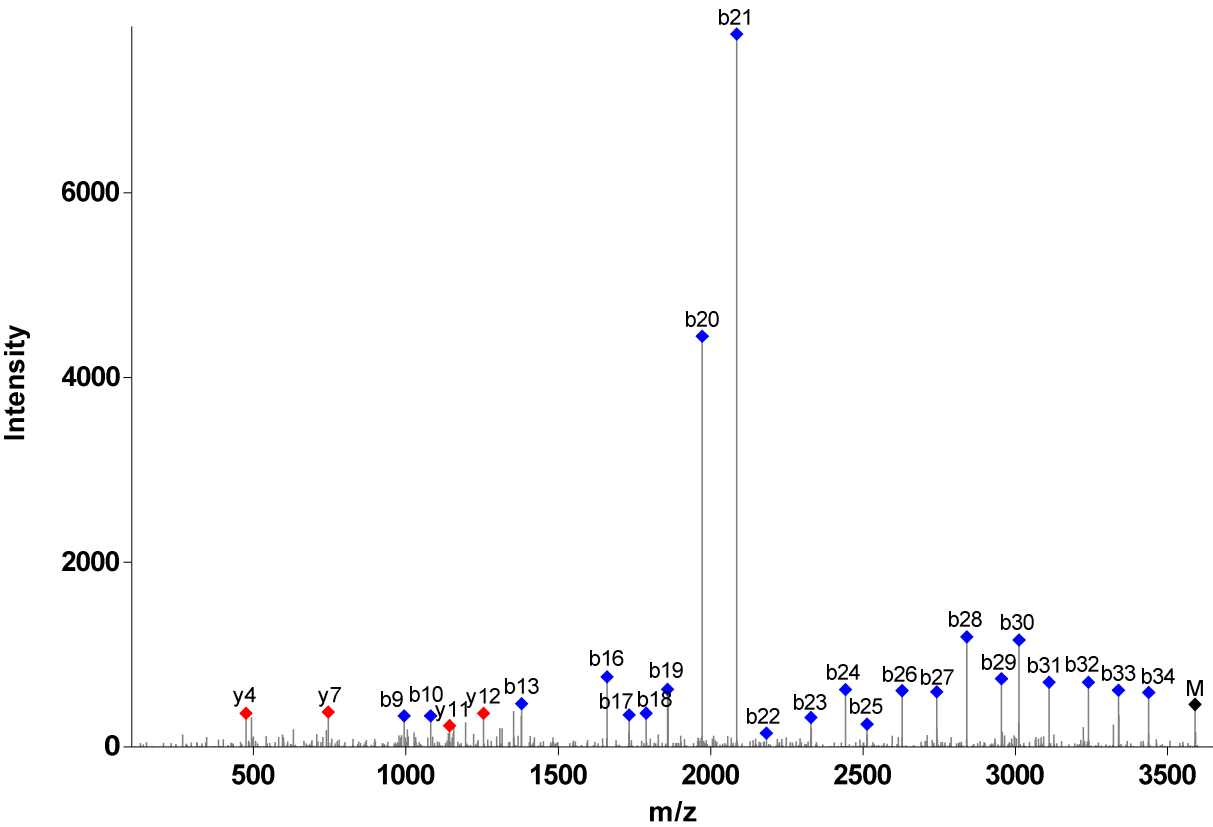

Ion series: ◆ b ions, ◆ y ions, ◆ other ions - Masses: ◆

Value Types : Delta Mass

Percentage of most intense peaks: 70<x<10050<x<7030<x<5010<x<30<10

|          |    |        |    |    |       |       |        |    |       |        |    |       |       |    |       |       |       |       |        |        |       |       |       |       |       |       |        |        |        |       |        |        |       |        |    |
|----------|----|--------|----|----|-------|-------|--------|----|-------|--------|----|-------|-------|----|-------|-------|-------|-------|--------|--------|-------|-------|-------|-------|-------|-------|--------|--------|--------|-------|--------|--------|-------|--------|----|
|          | 1  | 2      | 3  | 4  | 5     | 6     | 7      | 8  | 9     | 10     | 11 | 12    | 13    | 14 | 15    | 16    | 17    | 18    | 19     | 20     | 21    | 22    | 23    | 24    | 25    | 26    | 27     | 28     | 29     | 30    | 31     | 32     | 33    | 34     | 35 |
| a        |    | -0.003 |    |    |       |       |        |    |       |        |    | 0.066 |       |    |       |       |       |       |        |        |       |       |       |       |       |       |        |        |        |       |        |        |       |        |    |
| a-H2O    |    |        |    |    |       |       |        |    |       |        |    |       |       |    |       |       |       |       |        |        |       |       |       |       |       |       |        |        |        |       |        |        |       |        |    |
| a-NH3    |    |        |    |    |       |       |        |    |       |        |    |       |       |    |       |       |       |       |        |        |       |       |       |       |       |       |        |        |        |       |        |        |       |        |    |
| b        |    |        |    |    | 0.012 |       | -0.013 |    | 0.008 | -0.017 |    | 0.002 | 0.011 |    | 0.003 | 0.002 | 0.021 | 0.007 | -0.004 | -0.006 | 0.001 | 0.020 | 0.001 | 0.083 | 0.012 | 0.013 | -0.001 | -0.003 |        | 0.345 |        | 0.015  | 0.024 | 0.031  |    |
| b-H2O    |    |        |    |    |       |       |        |    |       |        |    |       |       |    |       |       |       |       |        |        |       |       |       |       |       |       | -0.051 |        |        |       | -0.006 |        | 0.342 |        |    |
| b-NH3    |    |        |    |    |       |       |        |    |       |        |    |       |       |    |       |       |       |       |        |        |       |       |       |       |       |       |        |        |        |       | 0.003  | -0.009 |       | -0.076 |    |
| sequence | F  | F      | S  | S  | I     | A     | K      | L  | V     | S      | K  | V     | A     | P  | A     | L     | A     | G     | A      | I      | I     | P     | F     | I     | A     | D     | L      | V      | N      | G     | V      | E      | V     | V      | E  |
| y        |    | 0.015  |    |    |       | 0.296 | 0.164  |    |       |        |    |       |       |    |       |       |       |       |        |        |       |       |       | 0.005 |       |       | 0.004  | -0.001 | -0.006 |       | -0.000 | 0.003  |       |        |    |
| y-H2O    |    | 0.326  |    |    |       |       |        |    |       |        |    |       |       |    |       |       |       |       |        |        |       |       |       |       |       |       |        |        |        |       |        |        |       |        |    |
| y-NH3    |    |        |    |    |       |       |        |    |       |        |    |       |       |    |       |       |       |       |        |        |       |       |       |       |       |       |        |        |        |       |        |        |       |        |    |
|          | 35 | 34     | 33 | 32 | 31    | 30    | 29     | 28 | 27    | 26     | 25 | 24    | 23    | 22 | 21    | 20    | 19    | 18    | 17     | 16     | 15    | 14    | 13    | 12    | 11    | 10    | 9      | 8      | 7      | 6     | 5      | 4      | 3     | 2      | 1  |

precursor

delta mass

3+

0.010
